# Supplementary material for: Direct sulfur-containing compound speciation in crude oils and high-boiling fractions by APCI (+) FT-ICR mass spectrometry
Source: Royal Society of Chemistry journal article supplement (doi:10.1039/d3ay02060f), 2024-01-01
Supplement: d3ay02060f1.pdf [file d3ay02060f1.pdf]

## **Direct sulfur-containing compounds speciation in crude oils and high-boiling fractions by APCI (+) FT-ICR Mass Spectrometry**

Danielle Mitze Muller Franco<sup>a</sup>, Taynara Rodrigues Covas<sup>a</sup>, Rosana Cardoso Lopes Pereira<sup>a</sup>, Lidya Cardozo da Silva<sup>a</sup>, Mario Duncan Rangel<sup>a</sup>, Rosineide Costa Simas<sup>b</sup>, Gabriel Henry Morais Dufrayer<sup>a</sup>, Boniek Gontijo Vaz<sup>a\*</sup>

**Table S1: Individual results obtained on one day five times for Oil D in APCI (+) for REPE data.**

|            | S[H] (%) | S• (%) |
|------------|----------|--------|
| OIL D (R1) | 3.35     | 1.06   |
| OIL D (R2) | 3.96     | 1.00   |
| OIL D (R3) | 3.73     | 0.91   |
| OIL D (R4) | 3.54     | 0.94   |
| OIL D (R5) | 3.37     | 0.99   |
| Mean       | 3.59     | 0.98   |
| DP         | 0.23     | 0.05   |
| CV(%)      | 6.41     | 5.28   |

**Table S2: Individual Results obtained on twelve different days for Oil D in APCI (+) for REPRO data.**

|                | S[H] (%) | S• (%) |
|----------------|----------|--------|
| OIL D (Day 1)  | 3.73     | 0.79   |
| OIL D (Day 2)  | 3.72     | 0.74   |
| OIL D (Day 3)  | 3.49     | 0.76   |
| OIL D (Day 4)  | 3.79     | 0.83   |
| OIL D (Day 5)  | 3.58     | 0.78   |
| OIL D (Day 6)  | 3.39     | 0.69   |
| OIL D (Day 7)  | 3.10     | 0.72   |
| OIL D (Day 8)  | 3.43     | 0.74   |
| OIL D (Day 9)  | 3.62     | 0.50   |
| OIL D (Day 10) | 3.49     | 0.73   |
| OIL D (Day 11) | 3.14     | 0.79   |
| OIL D (Day 12) | 3.37     | 0.99   |
| Mean           | 3.49     | 0.76   |
| DP             | 0.21     | 0.11   |
| CV(%)          | 6.01     | 14.07  |

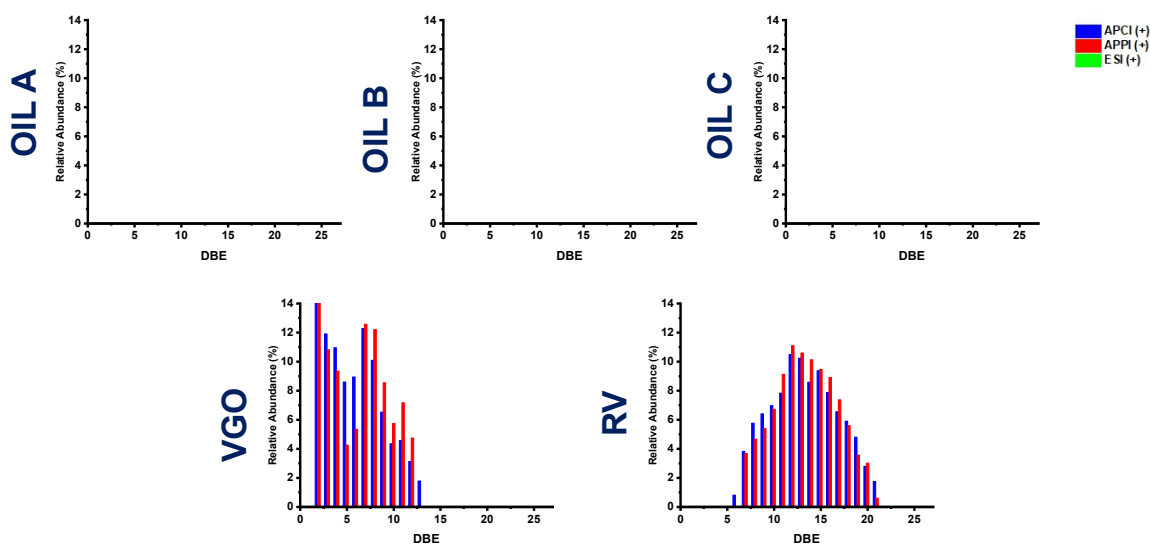

**Figure S1:** Distribution of DBE (double bonds equivalents = ring plus double bonds to carbon) distribution for members of S2 class all in positive mode ESI, APP.I and, APC.I 7-T Fourier transform ion cyclotron resonance of samples.
